# Supplementary material
Source: publisher figshare collection journal article supplement (https://gsajournals.figshare.com/ndownloader/files/21524730)
Supplement: Supplementary file 1 [file 21524730]

**Supplementary Table S1** Molecular markers designed for the identification of recombinants within the anthracnose resistance locus *Cs-SC112*.

| **Marker Name** | **Type1** | **SNP flanking region** | **Position** |
| --- | --- | --- | --- |
| SNP_Sb005g022920 | KASP | AATAGGAAAGTT[A/G]GAAAAGGAGGAG | 64784452 |
| SNP_Sb005g55256930 | KASP | GGCACCGACGAC[G/A]ACACGCCAGCGT | 64840542 |
| SNP_65171076 2 | INDEL | CTCCTCAACGAC[::::::/AACGAC]GTCCGCGTGGTC | 65171076 |
| SNP_Sb005g172300 | KASP | AGCAAAGTCACC[A/G]CAGACCTCTTGG | 65194327 |
| SNP_Sb005g56057061 | KASP | AACACTGTACCT[T/G]GTGATCAGTGCT | 65640662 |

1 KASP refers to Kompetitive Allele-Specific PCR. INDEL refers to insertion/deletion

2 Forward: 5’- CTCGACGGACGTTATCAAG-3’, Reverse: 5’- CCATCCATGATATGACGAAGAA- 3’

**Supplementary Table S2** Parameters of the polymerase chain reactions (PCR) used for the Kompetitive Allele Specific PCR (KASP) markers.

|  | SNP_Sb005g022920 | |  | SNP_Sb005g55256930 | |  | SNP_Sb005g172300 | |  | SNP_Sb005g56057061 | |
| --- | --- | --- | --- | --- | --- | --- | --- | --- | --- | --- | --- |
| Time | Temp. | Cycles |  | Temp. | Cycles |  | Temp. | Cycles |  | Temp. | Cycles |
| 15:00 | 94°C | 1 |  | 94°C | 1 |  | 94°C | 1 |  | 94° C | 1 |
|  |  |  |  |  |  |  |  |  |  |  |  |
| 00:20 | 94°C | 10 |  | 94°C | 10 |  | 94°C | 10 |  | 94° C | 10 |
| 01:00 | 68-62°C1 |  | 68-62°C1 |  | 68-62°C1 |  | 65-57°C2 |
|  |  |  |  |  |  |  |  |  |  |  |  |
| 00:20 | 94°C | 50 |  | 94°C | 40 |  | 94°C | 40 |  | 94°C | 40 |
| 01:00 | 62°C |  | 62°C |  | 62°C |  | 57°C |
| ∞ | 4°C | 1 |  | 4°C | 1 |  | 4°C | 1 |  | ∞ | 1 |

1 The annealing temperature was decreased 0.6 ⁰C each cycle starting from 68⁰C down to 62⁰C.

2 The annealing temperature was decreased 0.8 ⁰C each cycle starting from 62⁰C down to 57⁰C
